# Supplementary material for: Molecular probes of spike ectodomain and its subdomains for SARS-CoV-2 variants, Alpha through Omicron
Source: PubMed Central journal article supplement (PMC8750702; doi:10.1101/2021.12.29.474491), 2021-12-30
Supplement: NIHPP2021.12.29.474491V1-supplement-1.pdf [file NIHPP2021.12.29.474491V1-supplement-1.pdf]

**S1 Table. Plasmids from this study and their Addgene accession numbers.**

| Plasmid name                                                                          | Addgene # |
|---------------------------------------------------------------------------------------|-----------|
| pVRC8400-SARS-CoV-2-S2P-AVI                                                           | 160474    |
| pVRC8400-SARS-CoV-2-S2P-D614G-AVI                                                     | 176324    |
| pVRC8400-SARS-CoV-2-S2P-B.1.1.7-AVI                                                   | 176325    |
| pVRC8400-SARS-CoV-2-S2P-B.1.351-AVI                                                   | 176326    |
| pVRC8400-SARS-CoV-2-S2P-P.1-AVI                                                       | 176327    |
| pVRC8400-SARS-CoV-2-S2P-B.1.429-AVI                                                   | 176328    |
| pVRC8400-SARS-CoV-2-S2P-B.1.526-S477N-AVI                                             | 176329    |
| pVRC8400-SARS-CoV-2-S2P-B.1.526-E484K-AVI                                             | 176330    |
| pVRC8400-SARS-CoV-2-S2P-B.1.617-E154K-L452R-E484Q-D614G-P681R-AVI                     | 176331    |
| pVRC8400-SARS-CoV-2-S2P-B.1.617-G142D-E154K-L452R-E484Q-D614G-P681R-Q1071H-H1101D-AVI | 176332    |
| pVRC8400-SARS-CoV-2-S2P-B.1.617.1-AVI                                                 | 176333    |
| pVRC8400-SARS-CoV-2-S2P-B.1.617.2-AVI                                                 | 176334    |
| pVRC8400-SARS-CoV-2-S2P-AY.1-AVI                                                      | 176335    |
| pVRC8400-SARS-CoV-2-S2P-B.1.618-AVI                                                   | 176336    |
| pVRC8400-SARS-CoV-2-S2P-C.37-AVI                                                      | *         |
| pVRC8400-SARS-CoV-2-S2P-B.1.621-AVI                                                   | *         |
| pVRC8400-SARS-CoV-2-S2P-B.1.1.529-AVI                                                 | *         |
| pVRC8400-SARS-CoV-2-NTD-AVI                                                           | 160475    |
| pVRC8400-SARS-CoV-2-NTD-B.1.1.7-AVI                                                   | 176424    |
| pVRC8400-SARS-CoV-2-NTD-B.1.351-AVI                                                   | 176426    |
| pVRC8400-SARS-CoV-2-NTD-P.1-AVI                                                       | 176429    |
| pVRC8400-SARS-CoV-2-NTD-W152C-AVI                                                     | 176431    |
| pVRC8400-SARS-CoV-2-NTD-T95I-D253G-AVI                                                | 176432    |
| pVRC8400-SARS-CoV-2-NTD-E154K-AVI                                                     | 176433    |
| pVRC8400-SARS-CoV-2-NTD-G142D-E154K-AVI                                               | 176434    |
| pVRC8400-SARS-CoV-2-NTD-B.1.617.1-AVI                                                 | 176435    |
| pVRC8400-SARS-CoV-2-NTD-B.1.617.2-AVI                                                 | 176436    |
| pVRC8400-SARS-CoV-2-NTD-AY.1-AVI                                                      | 176437    |
| pVRC8400-SARS-CoV-2-NTD-B.1.618-AVI                                                   | 176438    |
| pVRC8400-SARS-CoV-2-NTD-C.37-AVI                                                      | *         |
| pVRC8400-SARS-CoV-2-NTD-B.1.621-AVI                                                   | *         |
| pVRC8400-SARS-CoV-2-NTD-B.1.1.529-AVI                                                 | *         |
| pVRC8400-SARS-CoV-2-RBD-AVI                                                           | 160476    |
| pVRC8400-SARS-CoV-2-RBD-N501Y-AVI                                                     | 176439    |
| pVRC8400-SARS-CoV-2-RBD-K417N-E484K-N501Y-AVI                                         | 176440    |
| pVRC8400-SARS-CoV-2-RBD-K417T-E484K-N501Y-AVI                                         | 176441    |
| pVRC8400-SARS-CoV-2-RBD-L452R-AVI                                                     | 176442    |
| pVRC8400-SARS-CoV-2-RBD-S477N-AVI                                                     | 176443    |
| pVRC8400-SARS-CoV-2-RBD-E484K-AVI                                                     | 176444    |
| pVRC8400-SARS-CoV-2-RBD-L452R-E484Q-AVI                                               | 176445    |
| pVRC8400-SARS-CoV-2-RBD-L452R-T478K-AVI                                               | 176446    |
| pVRC8400-SARS-CoV-2-RBD-K417N-L452R-T478K-AVI                                         | 176447    |
| pVRC8400-SARS-CoV-2-RBD-C.37-AVI                                                      | *         |
| pVRC8400-SARS-CoV-2-RBD-B.1.621-AVI                                                   | *         |
| pVRC8400-SARS-CoV-2-RBD-B.1.1.529-AVI                                                 | *         |
| pVRC8400-SARS-CoV-2-RBD-SD1-WA1-AVI                                                   | 176448    |
| pVRC8400-SARS-CoV-2-RBD-SD1-N501Y-A570D-AVI                                           | 176449    |
| pVRC8400-SARS-CoV-2-RBD-SD1-K417N-E484K-N501Y+A76-AVI                                 | 176450    |
| pVRC8400-SARS-CoV-2-RBD-SD1-K417T-E484K-N501Y-AVI                                     | 176451    |
| pVRC8400-SARS-CoV-2-RBD-SD1-L452R-AVI                                                 | 176452    |
| pVRC8400-SARS-CoV-2-RBD-SD1-S477N-AVI                                                 | 176453    |
| pVRC8400-SARS-CoV-2-RBD-SD1-E484K-AVI                                                 | 176454    |
| pVRC8400-SARS-CoV-2-RBD-SD1-L452R-E484Q-AVI                                           | 176455    |
| pVRC8400-SARS-CoV-2-RBD-SD1-L452R-T478K-AVI                                           | 176456    |
| pVRC8400-SARS-CoV-2-RBD-SD1-K417N-L452R-T478K-AVI                                     | 176457    |
| pVRC8400-SARS-CoV-2-RBD-SD1-C.37-AVI                                                  | *         |
| pVRC8400-SARS-CoV-2-RBD-SD1-B.1.621-AVI                                               | *         |
| pVRC8400-SARS-CoV-2-RBD-SD1-B.1.1.529-AVI                                             | *         |

\* Addgene access codes for these constructs are in the process of being obtained.

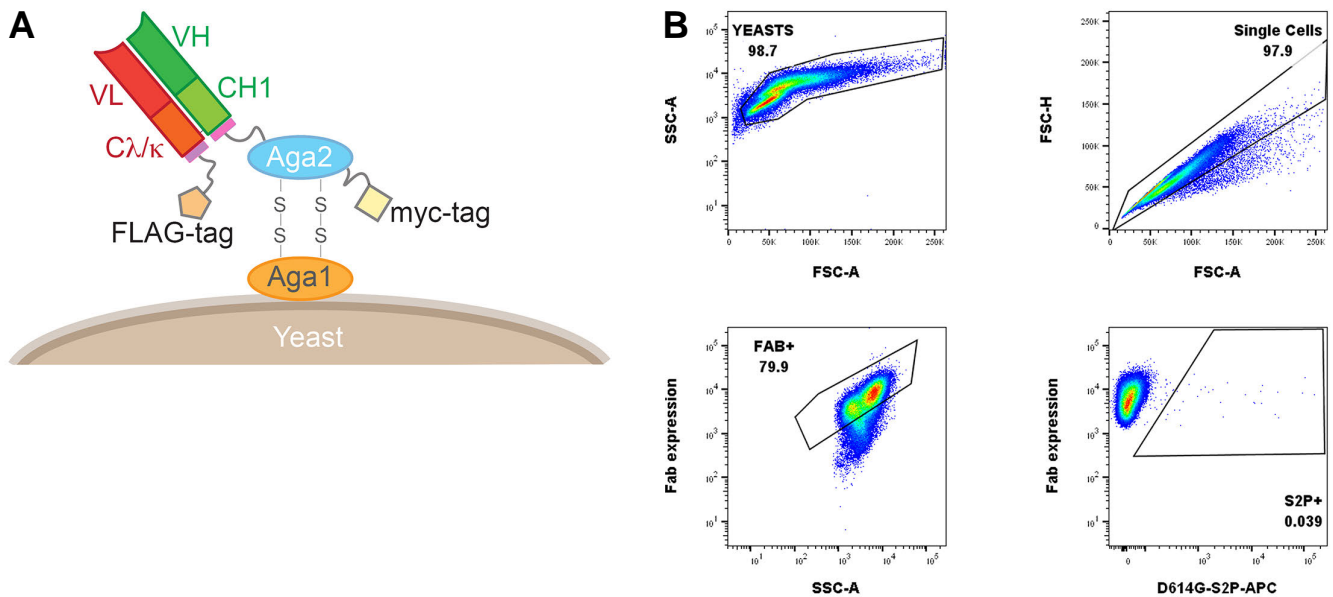

### S1 Fig. Yeast Fab Display and Gating Tree for Yeast Display Analysis of Probe Binding.

- (A) *Saccharomyces cerevisiae* strain AWY101 transfected with yeast display vector and Fab display is induced by incubating yeast in galactose containing media. The presence of Fab expressed on the yeast surface can be detected by staining with an anti-Flag antibody and analyzing using flow cytometry.
- (B) Induced yeast bearing Fabs of interested are analyzed by the indicated gating strategy. Singlets are analyzed for Fab expression and the proportion of probe binding determined within this population of yeast. Shown is a representative data.

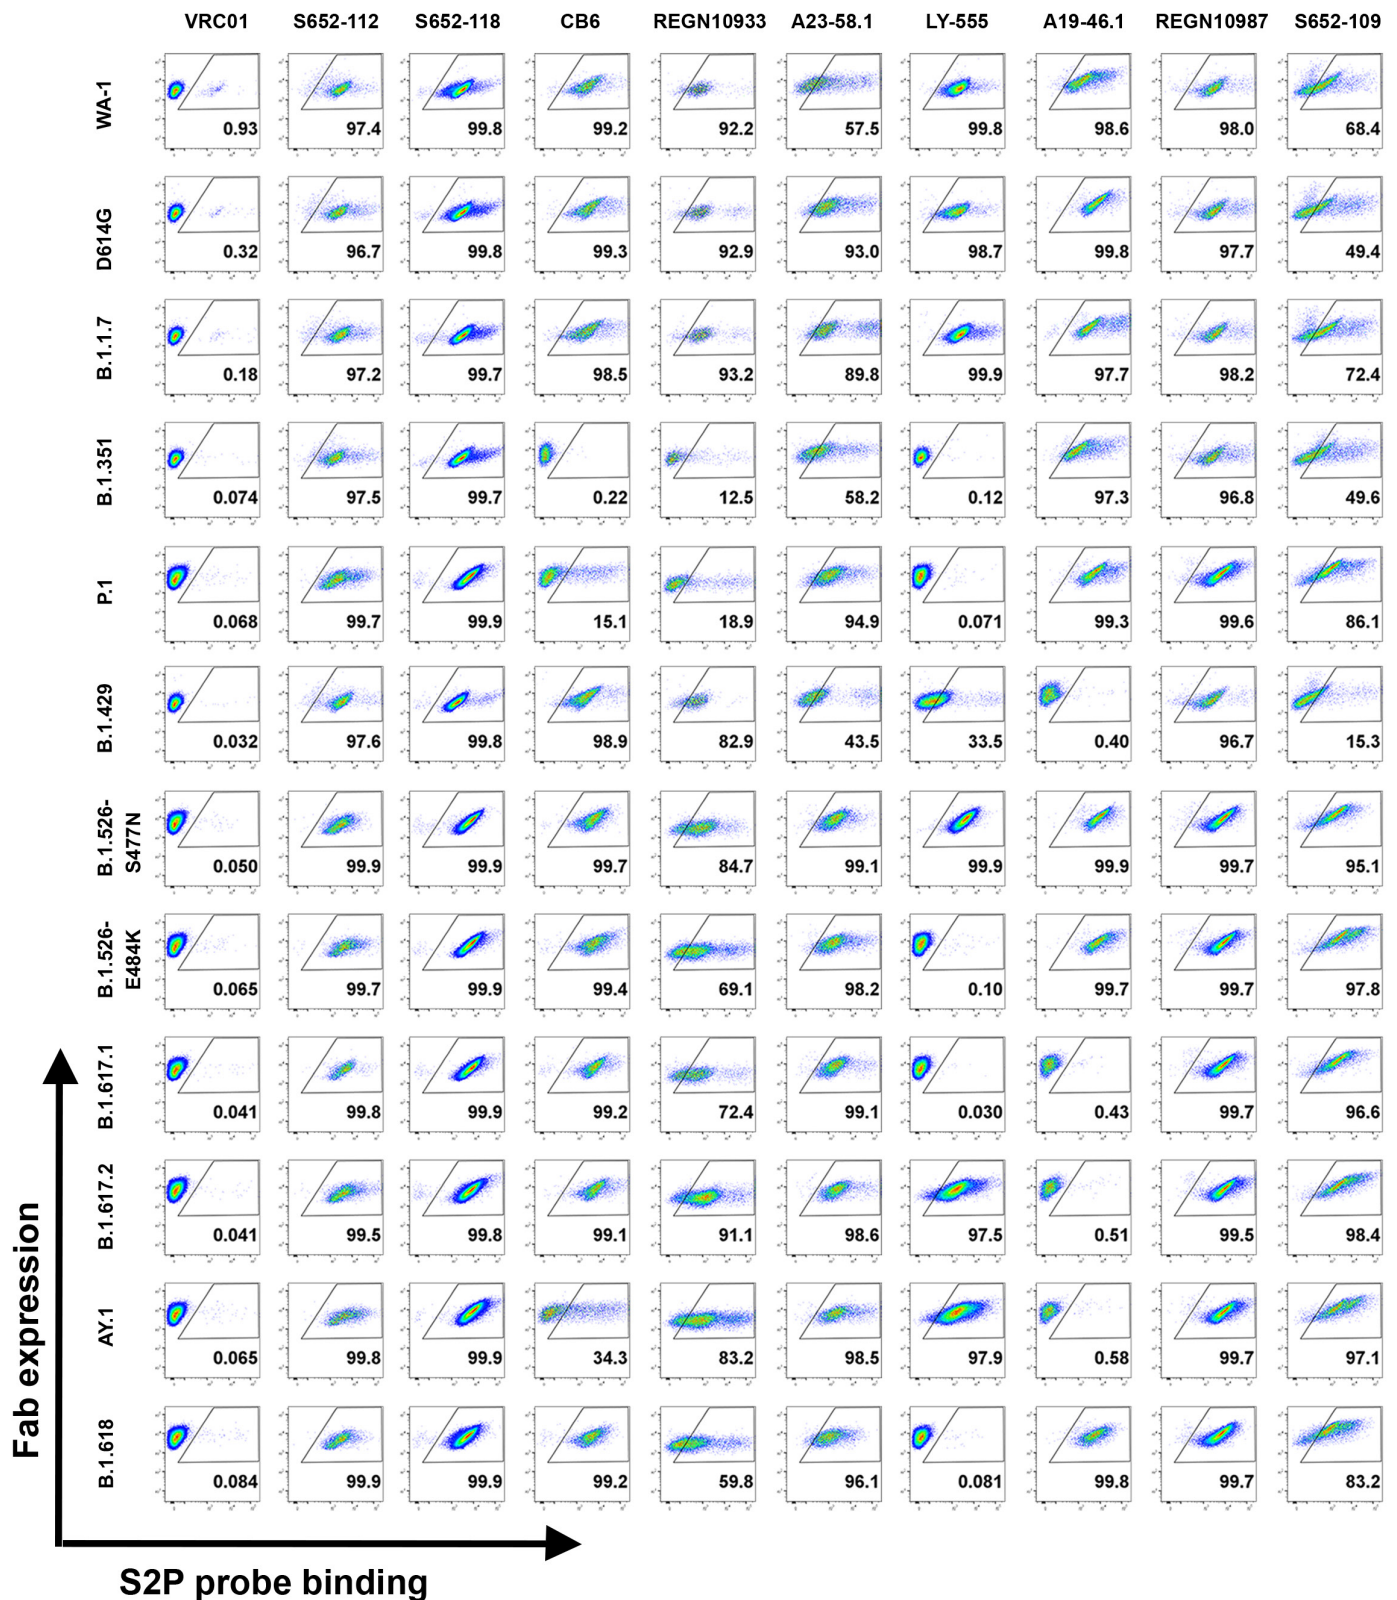

**S2 Fig. Yeast SARS-CoV cross-reactive and SARS-CoV-2 Fab binding to SARS-CoV-2 antigenic S2P probes.**

Binding of yeast expressing SARS-CoV cross-reactive Fabs (S652-118, S652-112, and S652-109), SARS-CoV-2 Fabs (LY-555, CB6, REGN10933, REGN10987, A19-46.1, and A23-58.1) or HIV targeting VRC01 Fab to SARS-CoV-2 VOC, VOI and other variant antigenic probes: WA-1, D614G, B.1.1.7, B.1.351, P.1, B.1.429, B.1.526-S477N, B.1.526-E484K, B.1.617.1, B.1.617.2, AY.1, and B.1.618 S2P (APC).

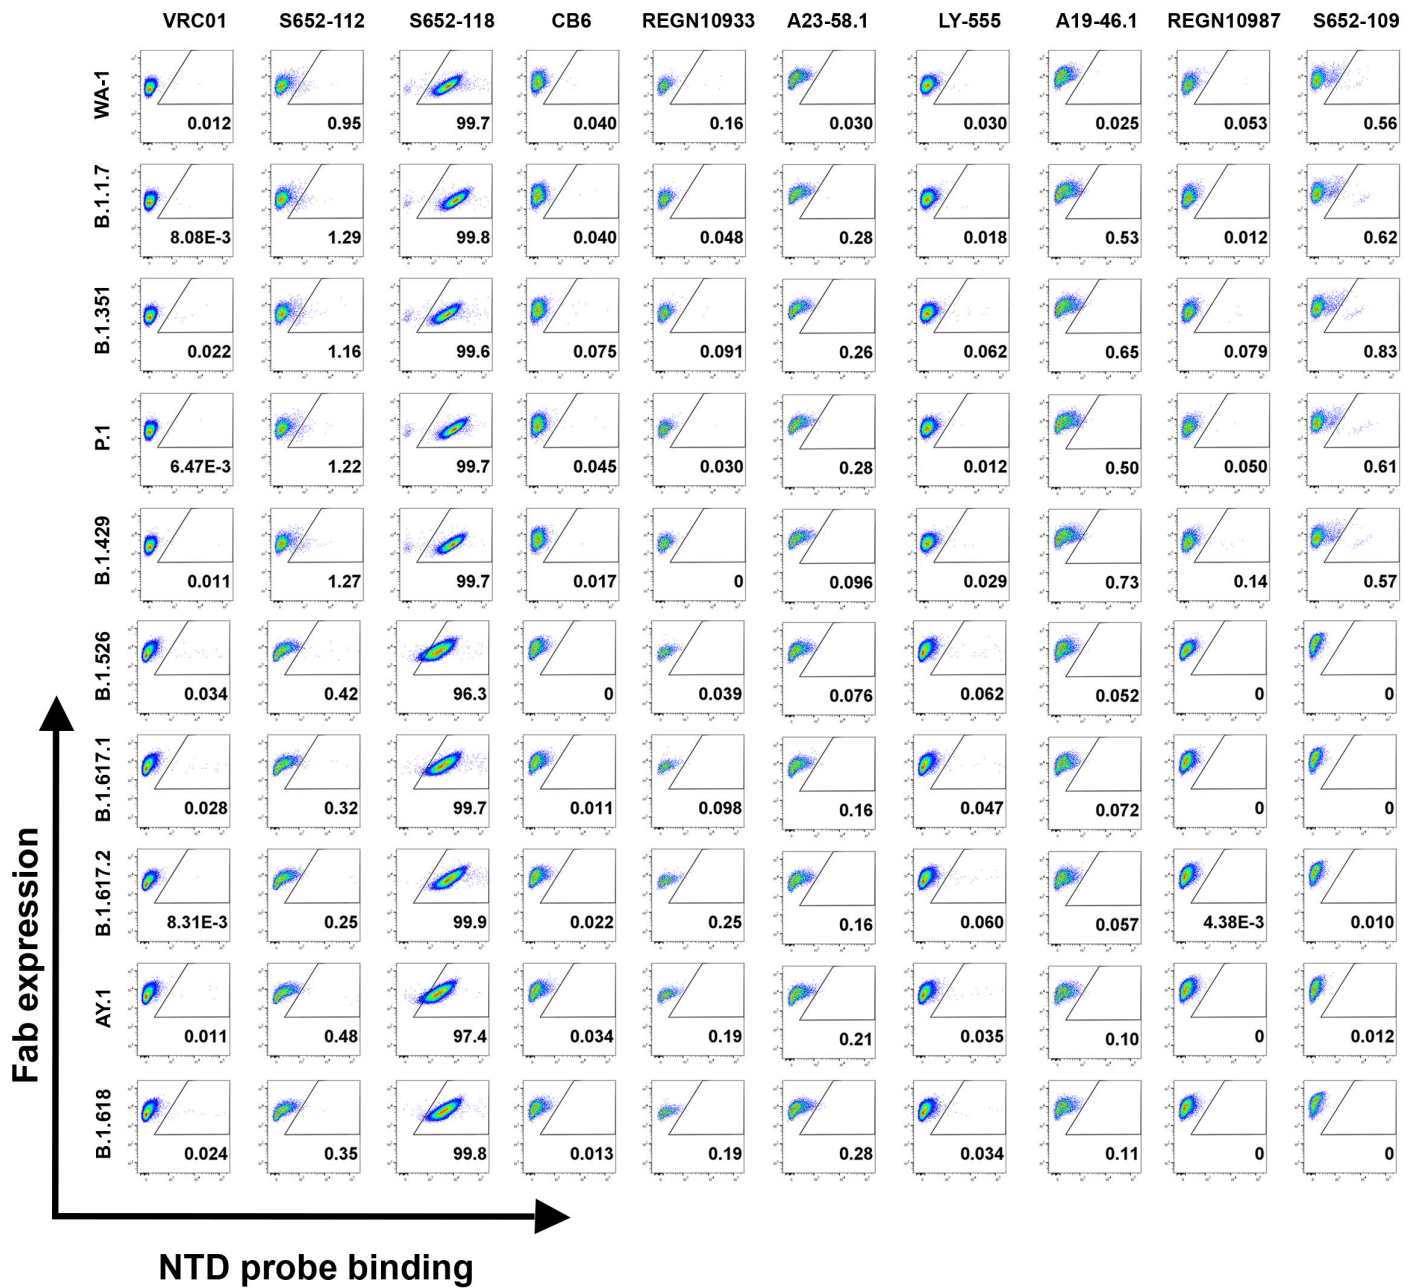

**S3 Fig. Yeast SARS-CoV cross-reactive and SARS-CoV-2 Fab binding to SARS-CoV-2 antigenic NTD probes.**

Binding of yeast expressing SARS-CoV cross-reactive Fabs (S652-118, S652-112, and S652-109), SARS-CoV-2 Fabs (LY-555, CB6, REGN10933, REGN10987, A19-46.1, and A23-58.1) or HIV targeting VRC01 Fab to SARS-CoV-2 VOC, VOI and other variant antigenic probes: WA-1, B.1.1.7, B.1.351, P.1, B.1.429, B.1.526, B.1.617.1, B.1.617.2, AY.1, and B.1.618 NTD (BV711).

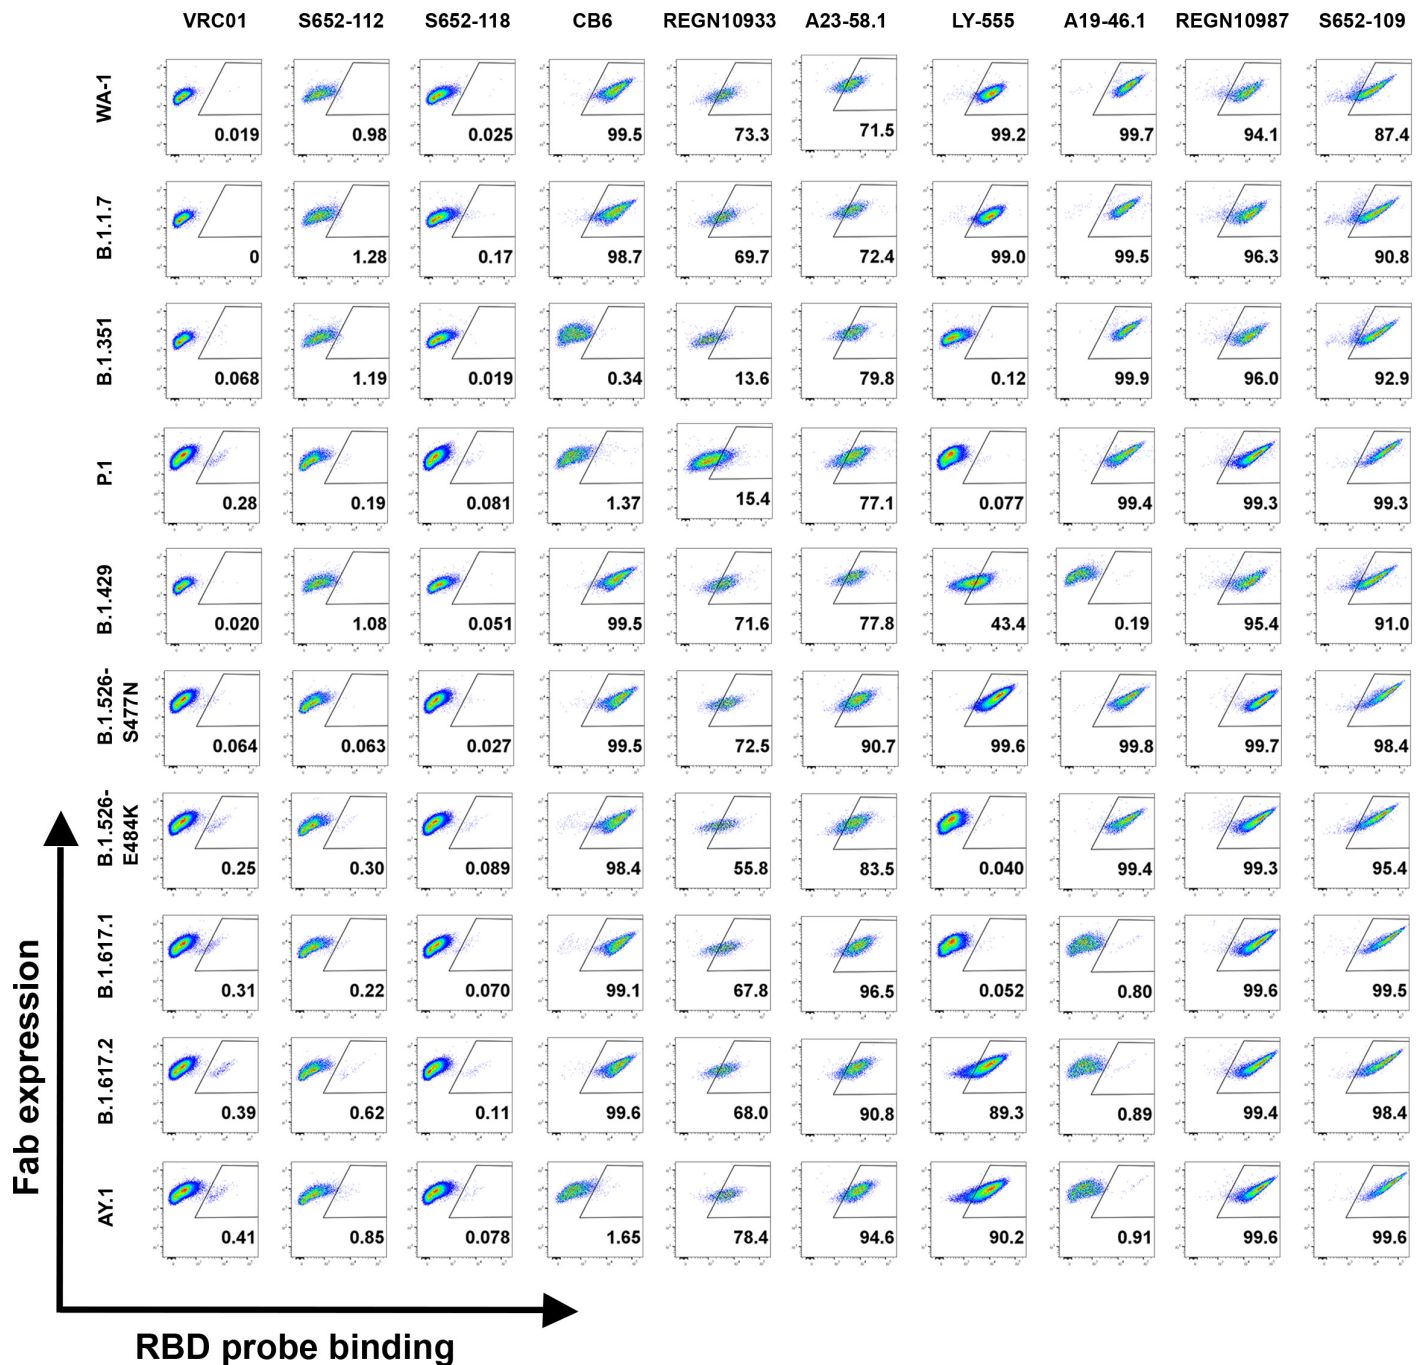

**S4 Fig. Yeast SARS-CoV cross-reactive and SARS-CoV-2 Fab binding to SARS-CoV-2 antigenic RBD probes.** Binding of yeast expressing SARS-CoV cross-reactive Fabs (S652-118, S652-112, and S652-109), SARS-CoV-2 Fabs (LY-555, CB6, REGN10933, REGN10987, A19-46.1, and A23-58.1) or HIV targeting VRC01 Fab to SARS-CoV-2 VOC, VOI and other variant antigenic probes: WA-1, B.1.1.7, B.1.351, P.1, B.1.429, B.1.526-S477N, B.1.526-E484K, B.1.617.1, B.1.617.2, and AY.1 RBD (BV421).

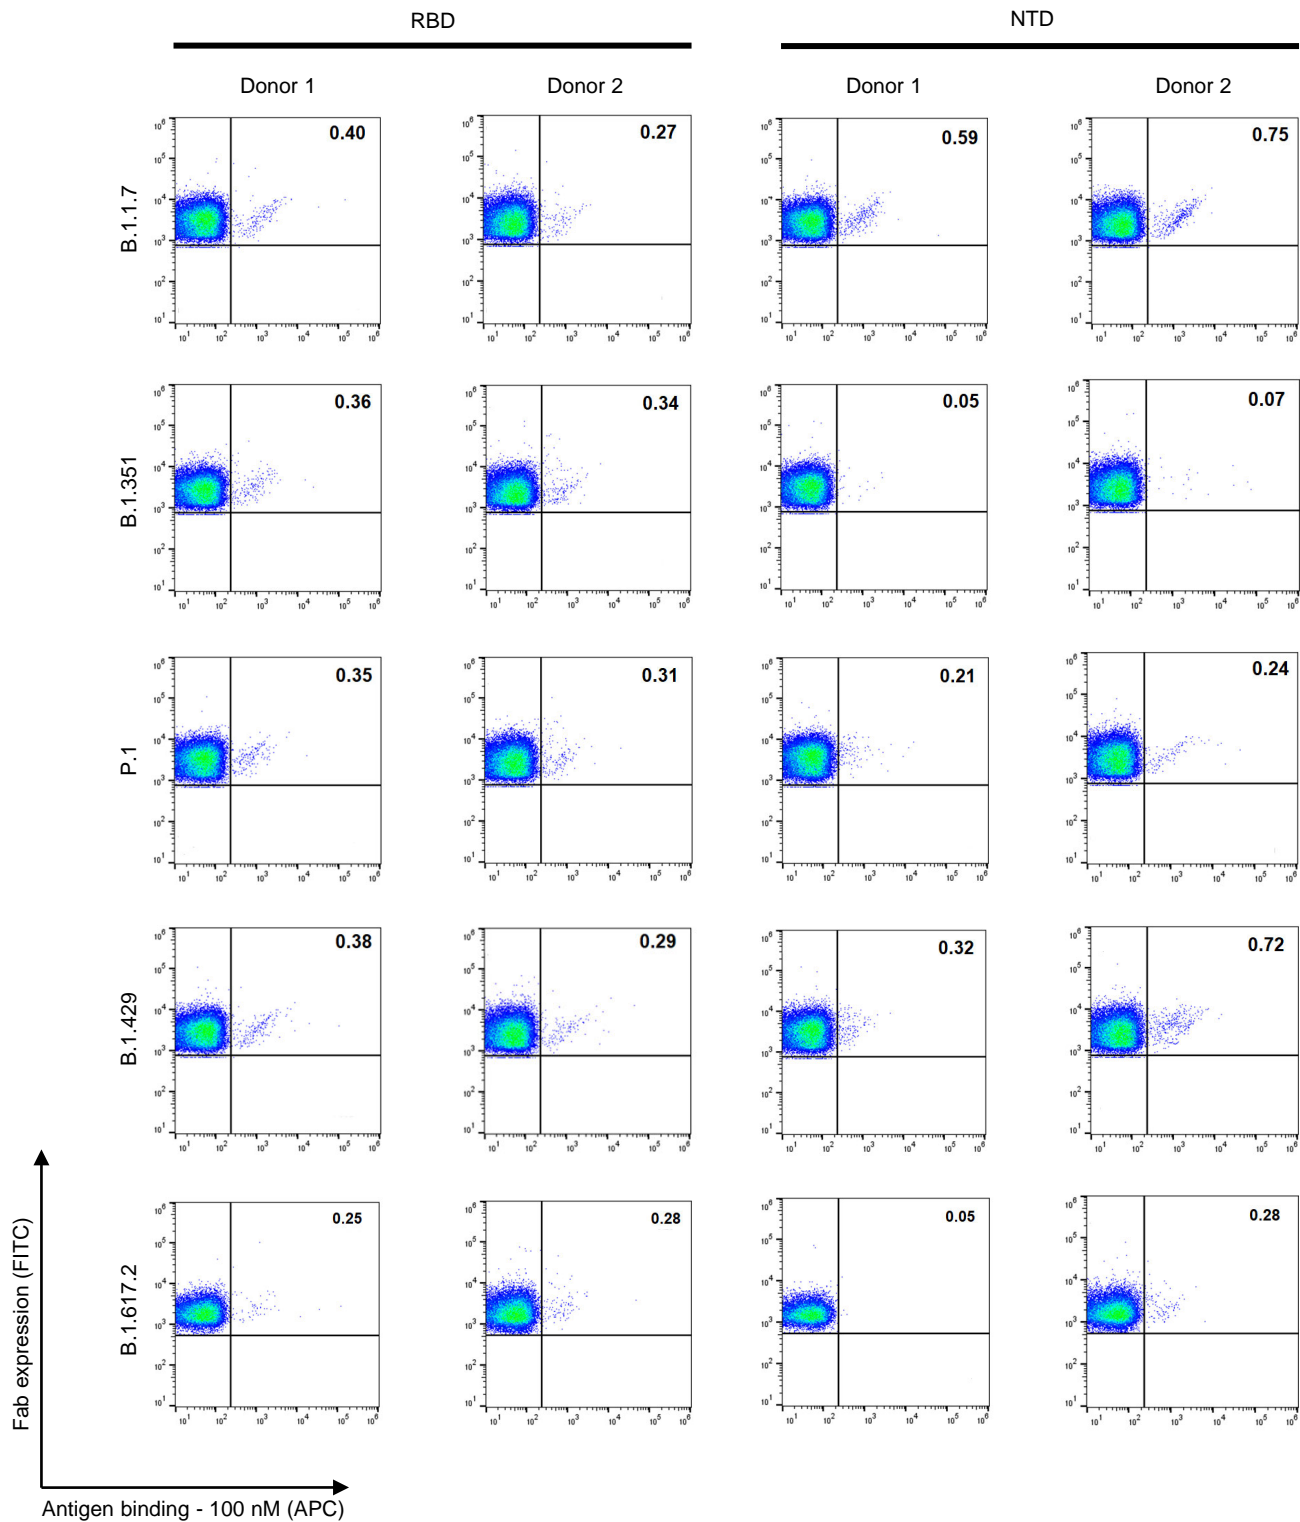

**S5 Fig. Yeast expressing human antibody repertoire binding to SARS-CoV-2 antigenic RBD and NTD probes.** Binding of yeast expressing SARS-CoV-2 libraries (donor 1 and donor 2), targeting RBD and NTD of SARS-CoV-2 variants: B.1.1.7, B.1.351, P.1, B.1.429, and B.1.617.2.

Representative image at 57,000x

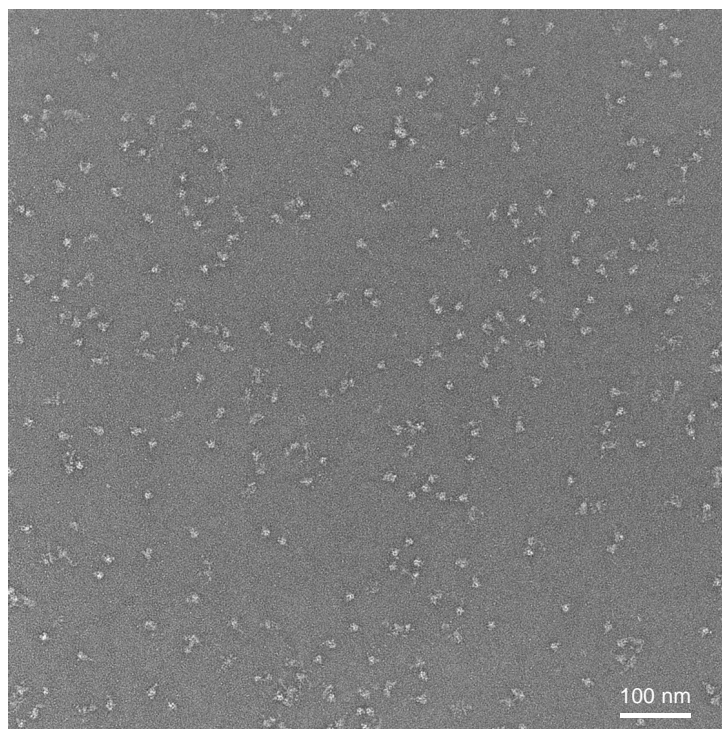

Representative 2D classes

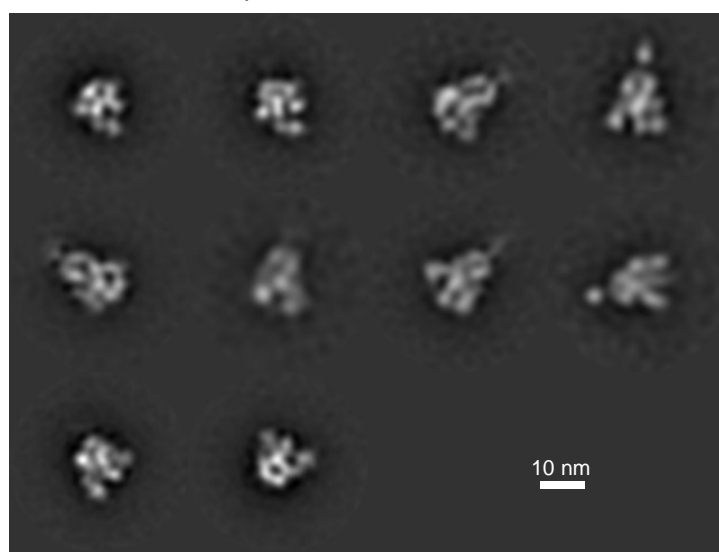

**S6 Fig. Negative-stain EM of the biotinylated SARS-CoV-2 Omicron variant S2P probes at pH 5.5 shows individual trimeric spike to be well folded.**

The top panel is the representative micrograph; the bottom panel shows the 2D-class averages. Sizes of scale bars are as indicated. At pH 5.5, B.1.1.529 S2P probe showed mostly trimeric particles with shapes similar to other S2P probes.
